# Supplementary material for: In silico analysis of energy interactions between nociceptin/orfanin FQ receptor and two antagonists with potential antidepressive action
Source: Royal Society of Chemistry journal article supplement (doi:10.1039/d2nj00916a), 2022-01-01
Supplement: d2nj00916a1.pdf [file d2nj00916a1.pdf]

## Supplementary Information

### ***IN SILICO* ANALYSIS OF ENERGY INTERACTIONS BETWEEN NOCICEPTIN/ORFANIN FQ RECEPTOR AND TWO ANTAGONISTS WITH POTENTIAL ANTIDEPRESSIVE ACTION**

J. L. S. Santos<sup>a</sup>, K. S. Bezerra<sup>a</sup>, E. D. Barbosa<sup>a</sup>, A. C. L. Pereira<sup>a</sup>, Y.

S. R. Meurer<sup>b</sup>, J. I. N. Oliveira<sup>a</sup>, E. C. Gavioli<sup>a</sup>, and U. L. Fulco<sup>a\*</sup>

*Departamento de Biofísica e Farmacologia, Universidade Federal do Rio Grande do Norte, 59072-970, Natal-RN, Brazil*

---

\* Corresponding author, e-mail: umbertofulco@gmail.com; Tel: +-55-84-32153793; Fax: +-55-84-32153791

TABLE S1. Energy values of NOPR receptor amino acids residues interacting with the ligand C-35, distance radius and functional binding region of the residue.

| <i>Amino Acid</i> | <i>Atomic group</i> | <i>Radius (Å)</i> | <i>Distance (Å)</i> | $\epsilon=10$ | $\epsilon=40$ |
|-------------------|---------------------|-------------------|---------------------|---------------|---------------|
| ASP130            | ii(N)H              | 2                 | 1.85                | -24.31        | -14.67        |
| GLN107            | iii(N)H             | 2.5               | 2.12                | -9.85         | -8.81         |
| ASP110            | iii(CB)H            | 2.5               | 2.33                | -15.25        | -7.79         |
| TRP116            | iii(CG)H            | 2.5               | 2.14                | -2.61         | -2.33         |
| VAL126            | iii(CAG)H           | 2.5               | 2.25                | -2.88         | -2.16         |
| TYR131            | iii(CAD)H           | 2.5               | 2.55                | -4.91         | -4.84         |
| CYS200            | iii(CD)H            | 2.5               | 2.16                | -0.19         | -0.14         |
| ILE219            | i(CBF)H             | 2.5               | 2.35                | -1.86         | -1.85         |
| SER223            | i(CBF)H             | 2.5               | 2.44                | -1.73         | -1.57         |
| TRP276            | ii(CAV)H            | 2.5               | 2.92                | -3.09         | -2.61         |
| VAL279            | ii(CAV)H            | 2.5               | 2.41                | -1.68         | -1.75         |
| TYR309            | ii(N)H              | 2.5               | 2.33                | -3.13         | -2.92         |
| ILE127            | iii(CAD)H           | 3                 | 2.51                | -5.38         | -5.10         |
| MET134            | i(CAW)H             | 3                 | 2.68                | -0.86         | -0.94         |
| PHE135            | i(CBE)H             | 3                 | 2.56                | -1.04         | -1.11         |
| LEU201            | iii(CAD)H           | 3                 | 2.94                | 0.01          | 0.29          |
| VAL202            | iii(CAD)H           | 3                 | 2.90                | -1.69         | -1.54         |
| GLN280            | i(CBB)H             | 3                 | 2.44                | -3.49         | -3.24         |
| VAL283            | ii(CAX)H            | 3                 | 2.73                | -1.83         | -2.02         |
| THR305            | iii(CAR)H           | 3                 | 2.56                | -1.99         | -1.74         |
| PHE220            | i(CBF)H             | 3.5               | 3.37                | -1.78         | -0.65         |
| ILE111            | iii(CB)H            | 4                 | 3.94                | -0.29         | -0.44         |
| GLU199            | iii(CD)H            | 4                 | 3.81                | -8.30         | -2.70         |
| CYS123            | iii(CD)H            | 4.5               | 4.41                | -1.52         | -1.01         |
| PHE224            | i(CBF)H             | 4.5               | 4.02                | -0.52         | -0.48         |
| ARG302            | iii(C)O             | 4.5               | 4.40                | 5.54          | 0.88          |
| TYR58             | iii(CAP)H           | 5                 | 4.68                | 0.08          | -0.17         |
| THR103            | iii(CG)H            | 5                 | 4.53                | -0.40         | -0.34         |
| PHE106            | iii(CG)H            | 5                 | 4.60                | 0.24          | -0.04         |
| VAL185            | iii(CAA)H           | 5                 | 4.55                | -0.27         | -0.28         |
| LEU284            | i(CBB)H             | 5                 | 4.89                | -0.25         | -0.20         |
| PHE118            | iii(CG)H            | 5.5               | 5.32                | 0.21          | -0.04         |
| ASN133            | ii(CAW)H            | 5.5               | 5.30                | -0.53         | -0.06         |
| GLY108            | iii(CG)H            | 6                 | 5.87                | -0.40         | -0.24         |
| ALA128            | iii(CAB)H           | 6.5               | 5.89                | -0.44         | -0.23         |
| TYR132            | i(CBD)CLBC          | 6.5               | 5.90                | 0.11          | -0.07         |
| VAL281            | i(CBA)CLAY          | 6.5               | 5.57                | -0.19         | -0.15         |
| PHE282            | i(CBA)CLAY          | 6.5               | 5.77                | 0.15          | -0.14         |
| LEU301            | iii(CAR)H           | 6.5               | 5.73                | -0.41         | -0.25         |
| GLY308            | ii(CAV)H            | 6.5               | 5.54                | 0.52          | 0.12          |
| VAL100            | iii(CAO)H           | 7                 | 6.02                | -0.42         | -0.23         |
| LEU104            | iii(N)H             | 7                 | 6.76                | -0.61         | -0.26         |
| THR109            | iii(CG)H            | 7                 | 6.13                | 0.47          | 0.14          |
| PHE115            | iii(CG)H            | 7                 | 6.08                | 0.01          | -0.05         |
| PRO117            | iii(CG)H            | 7                 | 6.52                | 0.13          | 0.00          |
| LEU122            | iii(CD)H            | 7                 | 6.13                | -0.35         | -0.15         |
| LYS124            | iii(CAG)H           | 7                 | 6.84                | 3.94          | 0.83          |
| ILE129            | iii(CAB)H           | 7                 | 6.49                | 0.53          | 0.20          |
| THR138            | i(CBE)H             | 7                 | 6.93                | 0.18          | 0.00          |
| VAL181            | i(CBE)H             | 7                 | 6.11                | -0.14         | -0.12         |
| GLY189            | iii(CAA)H           | 7                 | 6.33                | 0.24          | 0.03          |
| SER190            | iii(CAD)H           | 7                 | 6.70                | -0.35         | -0.14         |
| ALA191            | iii(CAD)H           | 7                 | 6.58                | -0.01         | -0.04         |
| GLU203            | iii(CAD)H           | 7                 | 6.94                | -4.36         | -1.14         |
| ALA216            | i(CBF)H             | 7                 | 6.18                | -0.35         | -0.15         |

|        |            |     |      |       |       |
|--------|------------|-----|------|-------|-------|
| CYS218 | i(CBF)H    | 7   | 6.56 | 0.15  | 0.01  |
| LEU221 | i(CBF)H    | 7   | 6.33 | -0.07 | -0.05 |
| PHE222 | i(CBF)H    | 7   | 6.83 | 0.27  | 0.07  |
| ILE225 | i(CBF)H    | 7   | 6.67 | -0.01 | -0.04 |
| THR277 | i(CBA)CLAY | 7   | 6.77 | -0.32 | -0.15 |
| PRO278 | i(CBA)CLAY | 7   | 6.45 | 0.12  | 0.00  |
| CYS304 | i(CAV)H    | 7   | 6.97 | 0.29  | 0.03  |
| ALA306 | iii(CAR)H  | 7   | 6.94 | -0.33 | -0.14 |
| THR125 | iii(CAC)H  | 7.5 | 7.16 | 0.06  | -0.01 |
| ILE204 | iii(CAD)H  | 7.5 | 7.36 | -0.13 | -0.06 |
| PHE215 | i(CBF)H    | 7.5 | 7.10 | -0.08 | -0.07 |
| GLN286 | iii(CAR)H  | 7.5 | 7.48 | -0.30 | -0.16 |
| PRO105 | iii(CG)H   | 8   | 7.73 | -0.13 | -0.06 |
| LEU112 | iii(CB)H   | 8   | 7.50 | 0.06  | 0.00  |
| GLY114 | iii(CB)H   | 8   | 7.71 | 0.29  | 0.06  |
| GLY119 | iii(CD)H   | 8   | 7.68 | -0.36 | -0.11 |
| GLY182 | i(CBD)CLBC | 8   | 7.77 | -0.34 | -0.11 |
| MET188 | iii(CAA)H  | 8   | 7.79 | 0.25  | 0.03  |
| ILE198 | iii(CD)H   | 8   | 7.74 | 0.25  | 0.08  |
| ILE217 | i(CBF)H    | 8   | 7.55 | -0.19 | -0.07 |
| PHE272 | ii(CAW)H   | 8   | 7.87 | -0.28 | -0.13 |
| CYS275 | ii(CAW)H   | 8   | 7.88 | 0.04  | -0.01 |
| ALA285 | i(CBB)H    | 8   | 7.65 | 0.17  | 0.02  |
| ILE54  | iii(CAP)H  | 8.5 | 8.40 | 0.00  | -0.03 |
| VAL55  | iii(CB)H   | 8.5 | 8.44 | -0.17 | -0.06 |
| LEU113 | iii(CG)H   | 8.5 | 8.17 | 0.28  | 0.05  |
| THR136 | i(CBE)H    | 8.5 | 8.06 | 0.21  | 0.03  |
| SER137 | ii(CAW)H   | 8.5 | 8.36 | 0.25  | 0.04  |
| ALA186 | iii(CAB)H  | 8.5 | 8.26 | -0.25 | -0.09 |
| PRO227 | i(CBF)H    | 8.5 | 8.00 | 0.19  | 0.03  |
| GLY287 | i(CBB)H    | 8.5 | 8.44 | 0.05  | 0.00  |
| LEU307 | ii(CAV)H   | 8.5 | 8.40 | 0.15  | 0.01  |
| SER312 | ii(CAV)H   | 8.5 | 8.43 | 0.09  | 0.01  |
| ASN120 | iii(CD)H   | 9   | 8.55 | -0.71 | -0.20 |
| ALA178 | i(CBE)H    | 9   | 8.79 | -0.18 | -0.06 |
| GLN192 | iii(CD)H   | 9   | 8.66 | -0.23 | -0.07 |
| VAL226 | i(CBF)H    | 9   | 8.82 | 0.13  | 0.03  |
| VAL310 | ii(CAV)H   | 9   | 8.88 | 0.03  | -0.02 |
| ASN311 | ii(CAV)H   | 9   | 8.87 | 0.16  | 0.03  |
| LYS51  | iii(CB)H   | 9.5 | 9.25 | 4.13  | 1.02  |
| LEU102 | iii(CG)H   | 9.5 | 9.46 | 0.13  | 0.02  |
| ALA121 | iii(CD)H   | 9.5 | 9.36 | -0.20 | -0.06 |
| PHE139 | i(CBE)H    | 9.5 | 9.20 | 0.10  | 0.01  |
| VAL228 | i(CBF)H    | 9.5 | 9.30 | 0.10  | 0.02  |
| PHE303 | iii(CAP)H  | 9.5 | 9.45 | -0.18 | -0.07 |
| VAL298 | iii(C)O    | 10  | 9.65 | -0.30 | -0.09 |

---

TABLE S2. Energy values of NOPR receptor amino acids residues interacting with the ligand SB, distance radius and functional binding region of the residue.

| <i>Amino Acid</i> | <i>Atomic group</i> | <i>Radius (Å)</i> | <i>Distance (Å)</i> | $\epsilon=10$ | $\epsilon=40$ |
|-------------------|---------------------|-------------------|---------------------|---------------|---------------|
| ASP130            | ii(N)H              | 2                 | 1.87                | -20.56        | -14.09        |
| ARG302            | iii(CAA)H           | 2                 | 1.95                | 3.69          | 1.35          |
| GLN107            | iii(CAA)H           | 2.5               | 2.19                | -5.02         | -4.55         |
| CYS200            | iii(CAF)H           | 2.5               | 2.36                | -2.24         | -2.16         |
| ILE219            | i(CAE)H             | 2.5               | 2.48                | -1.88         | -1.85         |
| SER223            | i(CAE)H             | 2.5               | 2.27                | -1.40         | -1.22         |
| GLN280            | i(CAH)H             | 2.5               | 2.38                | -2.93         | -2.64         |
| THR305            | iii(CAR)H           | 2.5               | 2.43                | -2.01         | -0.54         |
| TYR309            | ii(CAO)H            | 2.5               | 2.36                | -3.96         | -3.79         |
| ASP110            | iii(CAA)H           | 3                 | 2.7                 | -4.79         | -2.32         |
| ILE111            | iii(CA)H            | 3                 | 2.95                | -0.60         | -0.53         |
| TRP116            | iii(CAG)H           | 3                 | 2.59                | -1.99         | -1.96         |
| ILE127            | iii(O)H             | 3                 | 2.51                | -2.30         | -2.00         |
| TYR131            | i(CAU)CL            | 3                 | 2.8                 | -3.29         | -3.16         |
| MET134            | ii(CAO)H            | 3                 | 2.61                | -2.56         | -2.26         |
| PHE135            | i(CAI)H             | 3                 | 2.72                | -0.68         | -0.65         |
| TRP276            | ii(CAO)H            | 3                 | 2.92                | -2.74         | -2.44         |
| VAL279            | i(CAT)CLAC          | 3                 | 2.97                | -1.90         | -1.84         |
| VAL283            | ii(CBA)H            | 3                 | 2.66                | -1.34         | -1.21         |
| VAL126            | iii(CAF)H           | 3.5               | 3.38                | -1.64         | -1.52         |
| TYR58             | iii(CAA)H           | 4                 | 3.83                | -0.09         | -0.03         |
| PHE220            | i(CAE)H             | 4                 | 3.73                | -0.63         | -0.56         |
| PHE106            | iii(CAG)H           | 4.5               | 4.39                | 0.06          | -0.04         |
| GLY108            | iii(CA)H            | 4.5               | 4.31                | -0.39         | -0.32         |
| LEU201            | iii(CAY)O           | 4.5               | 4.17                | 0.08          | -0.02         |
| PHE224            | i(CAE)H             | 4.5               | 4.3                 | -0.39         | -0.36         |
| CYS123            | iii(CAF)H           | 5                 | 4.75                | -0.91         | -0.75         |
| GLU199            | iii(CAF)H           | 5                 | 4.98                | -2.87         | -0.98         |
| VAL202            | iii(O)H             | 5.5               | 5.22                | -0.28         | -0.24         |
| LEU284            | i(CAH)H             | 5.5               | 5.31                | -0.19         | -0.16         |
| VAL100            | ii(CAO)H            | 6                 | 5.63                | -0.21         | -0.17         |
| LEU104            | iii(CAA)H           | 6                 | 5.85                | -0.93         | -0.22         |
| ASN133            | ii(CAM)H            | 6                 | 5.6                 | 0.60          | 0.12          |
| VAL181            | i(CAI)H             | 6                 | 5.74                | -0.03         | -0.02         |
| VAL281            | i(CAT)CLAC          | 6                 | 5.72                | -0.19         | -0.16         |
| PHE282            | i(CAT)CLAC          | 6                 | 5.89                | 0.08          | -0.14         |
| GLN286            | ii(CAP)H            | 6                 | 5.9                 | -0.34         | -0.15         |
| THR103            | iii(CAA)H           | 6.5               | 6.06                | -0.20         | -0.19         |
| THR109            | iii(CAA)H           | 6.5               | 6.32                | 0.13          | 0.04          |
| PHE115            | iii(CAG)H           | 6.5               | 6.47                | -0.09         | -0.07         |
| TYR132            | i(CAU)CLAD          | 6.5               | 6.08                | 0.00          | 0.00          |
| VAL185            | i(CAU)CLAD          | 6.5               | 6.34                | -0.05         | -0.01         |
| ALA216            | i(CAE)H             | 6.5               | 6.33                | -0.27         | -0.12         |
| LEU221            | i(CAE)H             | 6.5               | 6.47                | -0.07         | -0.04         |
| PRO278            | i(CAT)CLAC          | 6.5               | 6.28                | 0.07          | -0.01         |
| LEU301            | ii(CAP)H            | 6.5               | 6.19                | -0.37         | -0.25         |
| GLY308            | ii(CAM)H            | 6.5               | 6.24                | 0.32          | 0.06          |
| VAL55             | iii(CAA)H           | 7                 | 6.96                | -0.09         | -0.05         |
| LEU112            | iii(CAA)H           | 7                 | 6.9                 | 0.04          | 0.03          |
| PRO117            | iii(CAG)H           | 7                 | 6.51                | 0.03          | -0.02         |
| PHE118            | iii(CAG)H           | 7                 | 6.71                | 0.03          | -0.03         |
| LEU122            | iii(CAF)H           | 7                 | 6.7                 | -0.16         | -0.09         |
| ALA128            | iii(O)H             | 7                 | 6.58                | -0.31         | -0.15         |
| THR138            | i(CAE)H             | 7                 | 6.95                | 0.08          | -0.02         |
| SER190            | iii(CAJ)H           | 7                 | 6.99                | -0.15         | -0.07         |
| CYS218            | i(CAE)H             | 7                 | 6.72                | 0.09          | 0.00          |
| PHE222            | i(CAE)H             | 7                 | 6.83                | 0.18          | 0.05          |
| ILE225            | i(CAE)H             | 7                 | 6.88                | 0.04          | 0.01          |
| THR277            | i(CAT)CLAC          | 7                 | 6.71                | -0.23         | -0.12         |
| ALA306            | iii(CAL)H           | 7                 | 6.72                | -0.99         | -0.11         |

|        |            |     |      |       |       |
|--------|------------|-----|------|-------|-------|
| ILE54  | iii(CAA)H  | 7.5 | 7.14 | 0.00  | 0.00  |
| PRO105 | iii(CAA)H  | 7.5 | 7.13 | -0.07 | -0.05 |
| LYS124 | iii(CAJ)H  | 7.5 | 7.33 | 1.67  | 0.35  |
| ILE129 | ii(CAM)H   | 7.5 | 7.12 | 0.24  | 0.08  |
| GLY189 | iii(CAY)O  | 7.5 | 7.37 | 0.10  | 0.00  |
| ALA191 | iii(CAF)H  | 7.5 | 7.1  | 0.03  | -0.03 |
| PHE215 | i(CAE)H    | 7.5 | 7.2  | -0.10 | -0.07 |
| CYS304 | ii(CAO)H   | 7.5 | 7.18 | 0.25  | 0.04  |
| GLY114 | iii(CAG)H  | 8   | 7.94 | 0.03  | 0.01  |
| GLY119 | iii(CAF)H  | 8   | 7.72 | -0.10 | -0.04 |
| THR125 | iii(O)H    | 8   | 7.98 | -0.09 | -0.06 |
| THR136 | i(CAI)H    | 8   | 7.78 | 0.14  | 0.02  |
| GLY182 | i(CAU)CLAD | 8   | 7.98 | -0.14 | -0.05 |
| ILE198 | iii(CAF)H  | 8   | 7.8  | 0.00  | 0.00  |
| ILE217 | i(CAE)H    | 8   | 7.88 | -0.14 | -0.06 |
| PRO227 | i(CAE)H    | 8   | 7.76 | 0.11  | 0.01  |
| PHE272 | ii(CM)H    | 8   | 7.86 | -0.19 | -0.10 |
| LEU113 | iii(CAG)H  | 8.5 | 8.43 | 0.07  | 0.00  |
| SER137 | i(CAI)H    | 8.5 | 8.44 | 0.17  | 0.02  |
| CYS275 | i(CAT)CLAC | 8.5 | 8.13 | -0.03 | -0.02 |
| ALA285 | i(CAT)CLAC | 8.5 | 8.33 | 0.11  | 0.01  |
| SER312 | ii(CAO)H   | 8.5 | 8.18 | 0.02  | 0.01  |
| LEU46  | iii(CAA)H  | 9   | 8.64 | -0.04 | -0.02 |
| LYS51  | iii(CAA)H  | 9   | 8.9  | 1.84  | 0.44  |
| ASN120 | iii(CAF)H  | 9   | 8.85 | -0.11 | -0.04 |
| ALA178 | i(CAI)H    | 9   | 8.9  | -0.13 | -0.04 |
| ALA186 | iii(O)H    | 9   | 8.95 | -0.06 | -0.03 |
| GLN192 | iii(CAF)H  | 9   | 8.54 | -0.14 | -0.05 |
| GLY287 | ii(CAM)H   | 9   | 8.54 | 0.06  | 0.00  |
| VAL298 | iii(CAK)H  | 9   | 8.56 | -0.22 | -0.08 |
| PHE303 | iii(CAL)H  | 9   | 8.67 | -0.09 | -0.05 |
| LEU307 | ii(CAO)H   | 9   | 8.81 | 0.13  | 0.01  |
| PHE139 | i(CAI)H    | 9.5 | 9.35 | 0.04  | -0.01 |
| GLU203 | iii(CAY)O  | 9.5 | 9.47 | -1.88 | -0.48 |
| VAL226 | i(CAE)H    | 9.5 | 9.12 | 0.08  | 0.01  |
| VAL228 | i(CAE)H    | 9.5 | 9.29 | 0.06  | 0.01  |
| ASN311 | ii(CAM)H   | 9.5 | 9.23 | 0.26  | 0.05  |
| LEU102 | iii(CAA)H  | 10  | 9.83 | 0.06  | 0.00  |
| ALA121 | iii(CAF)H  | 10  | 9.83 | -0.10 | -0.03 |
| ILE204 | ii(CAN)H   | 10  | 9.84 | -0.02 | -0.02 |
| VAL273 | i(CAT)CLAC | 10  | 9.71 | -0.18 | -0.06 |
| VAL310 | ii(CAO)H   | 10  | 9.52 | 2.41  | -0.02 |

---
